# Supplementary material for: Studying Outcomes after Steroid-Sparing Immunosuppressive Agent vs. Steroid-Only Treatment for Immune-Related Adverse Events in Non-Small-Cell Lung Cancer (NSCLC) and Melanoma: A Retrospective Case-Control Study
Source: MDPI journal article supplement (doi:10.3390/cancers16101892), 2024-05-16
Supplement: s1 [file s1]

## Supplemental Material

Supplemental Table S1. Baseline Comparison of Steroid Only vs SSIA Cohort, Pre-matching

|                                         | Steroid Only | SSIA/Steroid  | SMD    |
|-----------------------------------------|--------------|---------------|--------|
| n                                       | 136          | 35            |        |
| Median age at ICI start                 | 68 [60, 76]  | 64 [52, 70.5] | 0.43   |
| Age >= 65                               | 52 (38.2)    | 18 (51.4)     | 0.27   |
| Race                                    |              |               |        |
| Asian                                   | 2 (1.5)      | 1 (2.9)       | 0.01   |
| Black                                   | 23 (16.9)    | 5 (14.3)      | 0.03   |
| White                                   | 111 (81.6)   | 29 (82.9)     | 0.01   |
| Sex                                     |              |               |        |
| Female                                  | 77 (58.4)    | 21 (60.0)     | 118.00 |
| Male                                    | 55 (41.6)    | 14 (40.0)     |        |
| Tumor Stage                             |              |               |        |
| II or III                               | 26 (20.0)    | 7 (20.0)      | 0.02   |
| IV                                      | 106 (80.0)   | 28 (80.0)     |        |
| Tumor Type                              |              |               |        |
| Melanoma                                | 87 (65.7)    | 23 (65.7)     | 0.38   |
| NSCLC                                   | 45 (34.3)    | 12 (34.3)     |        |
| Has prior history of autoimmune disease | 5 (4.1)      | 1 (2.8)       | 0.02   |
| ECOG performance status                 |              |               |        |
| 0-1                                     | 122 (92.7)   | 34 (97.1)     | 0.06   |
| 2+                                      | 10 (7.3)     | 1 (2.9)       |        |
| Number of prior lines of therapy        |              |               |        |

|                                |           |           |      |
|--------------------------------|-----------|-----------|------|
| 0                              | 91 (68.6) | 24 (68.6) | 0.05 |
| 1 +                            | 42 (31.4) | 11 (31.4) |      |
| Single agent vs dual agent ICI |           |           |      |
| Single                         | 82 (61.9) | 19 (54.3) | 0.16 |
| Dual                           | 50 (38.1) | 16 (45.7) |      |

*Note:* SSIA: Steroid-Sparing Immunosuppressive Agents; ICI: Immune Checkpoint Inhibitors; ECOG: Eastern Cooperative Oncology Group. P-values were not calculated as recommended by Ho et.al. (2007). SMD >0.10 indicates a meaningful difference.

**Supplemental Table S2.** Best Overall Response of CS vs CS-SSIA cohorts.

|                                                   | CS        | CS-SSIA   | p    |
|---------------------------------------------------|-----------|-----------|------|
| Best Overall Response                             |           |           |      |
| Progression before irAE                           | 10 (7.2)  | 5 (14.3)  | 0.23 |
| Best overall response                             |           |           |      |
| Complete Response or NED after surgical resection | 17 (13.1) | 13 (37.1) | 0.01 |
| Partial Response                                  | 32 (24.2) | 7 (20.0)  | 0.63 |
| Stable Disease                                    | 47 (35.8) | 7 (20.0)  | 0.10 |
| Progressive Disease                               | 12 (9.3)  | 7 (20.0)  | 0.10 |
| Unable to assess                                  | 23 (17.1) | 1 (2.9)   | 0.03 |
| Timing of best response*                          |           |           |      |
| Prior to irAE; n (%)                              | 80 (60.7) | 29 (54.3) | 0.51 |
| After irAE; n (%)                                 | 29 (22.2) | 15 (42.9) | 0.02 |
| Unable to determine                               | 23 (17.1) | 1 (2.9)   | 0.04 |

*Note:* SSIA: Steroid-Sparing Immunosuppressive Agents; irAE: Immune-Related Adverse Events; IQR: Interquartile Range; PFS: Progression Free Survival; OS: Overall Survival. Counts for the Steroid Only cohort are rounded to the nearest whole integer after propensity score weighting.
